# Supplementary material for: Effects of Dietary Nitrate Supplementation on Back Squat and Bench Press Performance: A Systematic Review and Meta-Analysis
Source: MDPI journal article supplement (doi:10.3390/nu15112493), 2023-05-27
Supplement: s1 [file s1]

### **Online Supplementary Material**

#### **Search Strategy for Medline**

S1 ("nitrate" OR "beetroot") AND ("male" OR "men" OR "human") AND ("resistance" OR "training" OR "performance" OR "ergogenic" OR "exercise") AND ("power" OR "strength" OR "squat" OR "bench press") **(192)**

#### **Search Strategy for PubMed**

S2 ("nitrate" OR "beetroot") AND ("male" OR "men" OR "human") AND ("resistance" OR "training" OR "performance" OR "ergogenic" OR "exercise") AND ("power" OR "strength" OR "squat" OR "bench press") **(192)**

#### **Search Strategy for ScienceDirect**

S3 ("nitrate" OR "beetroot") AND ("resistance" OR "exercise" OR "performance" or "ergogenic") AND ("male" OR "men") AND ("power" OR "strength") **(118)**

#### **Search Strategy for Scopus**

S4 KEY(nitrate OR beetroot) AND (male OR men OR human) AND (resistance OR training OR performance OR ergogenic OR exercise) AND (power OR strength OR squat OR bench press) **(473)**

#### **Search Strategy for SPORTDiscus**

S5 ("nitrate" OR "beetroot") AND ("male" OR "men" OR "human") AND ("resistance" OR "training" OR "performance" OR "ergogenic" OR "exercise") AND/OR ("power" OR "strength" OR "squat" OR "bench press") **(50)**

**Table S1.** PICOS criteria

| <b>Parameter</b> | <b>Inclusion Criteria</b>                                                                                                                                                                                                                                |
|------------------|----------------------------------------------------------------------------------------------------------------------------------------------------------------------------------------------------------------------------------------------------------|
| Participant      | Adult healthy resistance-trained human males, age 18-65 years                                                                                                                                                                                            |
| Intervention     | NO <sub>3</sub> <sup>-</sup> supplementation, without other supplements ingested alongside the NO <sub>3</sub> <sup>-</sup> supplementation, and information was provided on the supplementation dose, timing, frequency, and vehicle of administration. |
| Comparator       | Placebo with negligible NO <sub>3</sub> <sup>-</sup> content                                                                                                                                                                                             |
| Outcomes         | Performance outcomes of power or velocity of contraction, or number of repetitions-to-failure (RTF) during resistance exercise.                                                                                                                          |
| Study Design     | Randomized, double-blinded, crossover, placebo-controlled, trials. Only studies that were published in English and as original research (i.e., not a conference abstract or review) were included.                                                       |

**Table S2.** Studies assessing the effects of dietary  $\text{NO}_3^-$  supplementation on weightlifting performance in males.

| Author                          | Subjects                                                                         | Supplementation                                                                                                                 | Exercise Protocol                                                                                                                                                                                                                                                                                                        | Findings                                                                                                                                                                                                                                                                                                               |
|---------------------------------|----------------------------------------------------------------------------------|---------------------------------------------------------------------------------------------------------------------------------|--------------------------------------------------------------------------------------------------------------------------------------------------------------------------------------------------------------------------------------------------------------------------------------------------------------------------|------------------------------------------------------------------------------------------------------------------------------------------------------------------------------------------------------------------------------------------------------------------------------------------------------------------------|
| Garnacho-Castaño et al. [31]    | Eleven men                                                                       | 2.5-h min prior to exercise ingestion of 140 mL of $\text{NO}_3^-$ -rich BR (~13 mmol or ~800 mg of $\text{NO}_3^-$ )           | Wall ball shots and back squat: performed with Olympic barbell at 50% of 1RM. 2 sets x 90-s of wall balls + 60-s of back squat. Set 1: 90-s of wall balls plus 60-s of full back squat with 3 min recovery between exercises. Set 2: 90-s of wall balls plus 60-s of full back squat with no recovery between exercises. | $\uparrow$ RTF: +13% (PL: $23 \pm 4$ vs. BR: $26 \pm 2$ reps)                                                                                                                                                                                                                                                          |
|                                 | Age: $29 \pm 4$ y<br>Ht: $1.75 \pm 0.06$ m<br>Wt: $79 \pm 5$ kg                  |                                                                                                                                 |                                                                                                                                                                                                                                                                                                                          |                                                                                                                                                                                                                                                                                                                        |
| Mosher et al. [32]              | Twelve men                                                                       | 6 d of $1 \times 70$ mL $\text{NO}_3^-$ -rich BR supplementation (~6.4 mmol or ~400 mg of $\text{NO}_3^- \cdot \text{d}^{-1}$ ) | Smith machine bench press: 3 sets of RTF at 60%1RM with 2 min recovery between sets                                                                                                                                                                                                                                      | $\uparrow$ RTF: +19.4%                                                                                                                                                                                                                                                                                                 |
|                                 | Age: $21 \pm 2$ y<br>Ht: $1.77 \pm 0.04$ m<br>Wt: $83 \pm 10$ kg                 |                                                                                                                                 |                                                                                                                                                                                                                                                                                                                          |                                                                                                                                                                                                                                                                                                                        |
| Ranchal-Sanchez et al. [37]     | Twelve men<br>Age: $24 \pm 3$ y<br>Ht: $1.75 \pm 0.08$ m<br>Wt: $73 \pm 9$ kg    | 2-h prior to exercise ingestion of $1 \times 70$ mL $\text{NO}_3^-$ -rich BR (~6.4 mmol or ~400 mg of $\text{NO}_3^-$ )         | Smith machine bench press and back squat: 3 sets x RTF at 60–70–80%1RM with 2 min recovery between sets<br>Following the eccentric phase of each rep, participants paused for 1.0–1.5-s                                                                                                                                  | $\leftrightarrow$ $P_{\text{peak}}$ back squat at 60, 70, and 80%1RM respectively (PL: $382 \pm 111$ vs. BR: $389 \pm 117$ W), (PL: $395 \pm 107$ vs. BR: $393 \pm 116$ W), and (PL: $378 \pm 96$ vs. BR: $377 \pm 108$ W)                                                                                             |
|                                 |                                                                                  |                                                                                                                                 |                                                                                                                                                                                                                                                                                                                          | $\leftrightarrow$ $P_{\text{peak}}$ bench press at 60, 70, and 80%1RM respectively (PL: $292 \pm 94$ vs. BR: $289 \pm 88$ W), (PL: $238 \pm 81$ vs. BR: $242 \pm 81$ W), and (PL: $191 \pm 55$ vs. BR: $176 \pm 66$ W)                                                                                                 |
|                                 |                                                                                  |                                                                                                                                 |                                                                                                                                                                                                                                                                                                                          | $\leftrightarrow$ $V_{\text{peak}}$ back squat at 60, 70, and 80%1RM respectively (PL: $0.7 \pm 0.1$ vs. BR: $0.7 \pm 0.1$ $\text{m} \cdot \text{s}^{-1}$ ), (PL: $0.6 \pm 0.1$ vs. BR: $0.6 \pm 0.1$ $\text{m} \cdot \text{s}^{-1}$ ), and (PL: $0.5 \pm 0.1$ vs. BR: $0.5 \pm 0.1$ $\text{m} \cdot \text{s}^{-1}$ )  |
|                                 |                                                                                  |                                                                                                                                 |                                                                                                                                                                                                                                                                                                                          | $\leftrightarrow$ $V_{\text{peak}}$ bench press at 60, 70, and 80%1RM respectively (PL: $0.6 \pm 0.1$ vs. BR: $0.6 \pm 0.1$ $\text{m} \cdot \text{s}^{-1}$ ), (PL: $0.4 \pm 0.1$ vs. BR: $0.4 \pm 0.1$ $\text{m} \cdot \text{s}^{-1}$ ), and (PL: $0.3 \pm 0.1$ vs. BR: $0.3 \pm 0.1$ $\text{m} \cdot \text{s}^{-1}$ ) |
|                                 |                                                                                  |                                                                                                                                 |                                                                                                                                                                                                                                                                                                                          | $\uparrow$ RTF back squat: +23.4% (PL: $46 \pm 16$ vs. BR: $60 \pm 20$ reps)                                                                                                                                                                                                                                           |
| Rodríguez-Fernandez et al. [38] | Eighteen men<br>Age: $23 \pm 5$ y<br>Ht: $1.77 \pm 0.10$ m<br>Wt: $74 \pm 10$ kg | 2.5-h prior to exercise ingestion of 140 mL $\text{NO}_3^-$ -rich BR (~13 mmol or ~800 mg of $\text{NO}_3^-$ )                  | 4 sets of half squats x 8 reps at inertial loads of 0.025, 0.050, 0.075, and 0.100 $\text{kg} \cdot \text{m}^2$ with 3 min recovery between sets                                                                                                                                                                         | $\uparrow$ RTF total (sum bench press and back squat): +17.7% (PL: $75 \pm 21$ vs. BR: $89 \pm 25$ reps)                                                                                                                                                                                                               |
|                                 |                                                                                  |                                                                                                                                 |                                                                                                                                                                                                                                                                                                                          | $\uparrow$ $P_{\text{mean}}$ for inertial loads of 0.025, 0.050, 0.075, and 0.100 respectively (PL: $1216 \pm 278$ vs. BR: $1434 \pm 324$ W), (PL: $1181 \pm 295$ vs. BR: $1396 \pm 293$ W), (PL: $1130 \pm 259$ vs. BR: $1382 \pm 328$ W), and (PL: $1033 \pm 255$ vs. BR: $1214 \pm 273$ W)                          |
|                                 |                                                                                  |                                                                                                                                 |                                                                                                                                                                                                                                                                                                                          | $\uparrow$ $P_{\text{peak}}$ for inertial loads of 0.025, 0.050, 0.075, and 0.100 respectively (PL: $2080 \pm 376$ vs. BR: $2447 \pm 505$ W), (PL: $2059 \pm 334$ vs. BR: $2351 \pm 479$ W), (PL: $1940 \pm 329$ vs. BR: $2333 \pm 492$ W), and (PL: $1807 \pm 347$ vs. BR: $2078 \pm 413$ W)                          |

|                 |                                                                                  |                                                                                                                                            |                                                                                                                                                                                                                                                                                                                                          |                                                                                                                                                                                                                                                            |
|-----------------|----------------------------------------------------------------------------------|--------------------------------------------------------------------------------------------------------------------------------------------|------------------------------------------------------------------------------------------------------------------------------------------------------------------------------------------------------------------------------------------------------------------------------------------------------------------------------------------|------------------------------------------------------------------------------------------------------------------------------------------------------------------------------------------------------------------------------------------------------------|
| Tan et al. [35] | Fourteen men<br>Age: $22 \pm 5$ y<br>Ht: $1.80 \pm 0.06$ m<br>Wt: $84 \pm 17$ kg | 2.5-h, 4 d and 2.5 h prior to exercise ingestion of 2 x 70 mL $\text{NO}_3^-$ -rich BR (~5.9 mmol or ~400 mg of $\text{NO}_3^-$ per 70 mL) | Back squat and bench press with barbell: warm-up x 3 reps, 5 reps at 40% 1RM, and 3 reps at 60% 1RM using 1-0-1-2 tempo interspersed with 2 min recovery between sets. 2 performance sets at 70% 1RM using 1-0-1-2 tempo interspersed with 2 min of rest. After 5 min recovery, 1 set x RTF at 60% 1RM performed without specified tempo | $\leftrightarrow P_{\text{mean}}$ during back squat after acute and chronic supplementation respectively (PL: $699 \pm 163$ vs. BR: $689 \pm 162$ W), (PL: $693 \pm 189$ vs. BR: $707 \pm 162$ W)                                                          |
|                 |                                                                                  |                                                                                                                                            |                                                                                                                                                                                                                                                                                                                                          | $\leftrightarrow P_{\text{mean}}$ during bench press after acute and chronic supplementation respectively (PL: $411 \pm 107$ vs. BR: $404 \pm 90$ W), (PL: $438 \pm 124$ vs. BR: $431 \pm 114$ W)                                                          |
|                 |                                                                                  |                                                                                                                                            |                                                                                                                                                                                                                                                                                                                                          | $\leftrightarrow P_{\text{peak}}$ during back squat after acute and chronic supplementation respectively (PL: $1700 \pm 444$ vs. BR: $1736 \pm 461$ W), (PL: $1810 \pm 478$ vs. BR: $1778 \pm 461$ W)                                                      |
|                 |                                                                                  |                                                                                                                                            |                                                                                                                                                                                                                                                                                                                                          | $\leftrightarrow P_{\text{peak}}$ during bench press after acute and chronic supplementation respectively (PL: $665 \pm 179$ vs. BR: $659 \pm 163$ W), (PL: $725 \pm 216$ vs. BR: $693 \pm 183$ W)                                                         |
|                 |                                                                                  |                                                                                                                                            |                                                                                                                                                                                                                                                                                                                                          | $\leftrightarrow V_{\text{mean}}$ during back squat after acute and chronic supplementation respectively (PL: $0.7 \pm 0.1$ vs. BR: $0.8 \pm 0.1$ $\text{m}\cdot\text{s}^{-1}$ ), (PL: $0.7 \pm 0.1$ vs. BR: $0.8 \pm 0.1$ $\text{m}\cdot\text{s}^{-1}$ )  |
|                 |                                                                                  |                                                                                                                                            |                                                                                                                                                                                                                                                                                                                                          | $\leftrightarrow V_{\text{mean}}$ during bench press after acute and chronic supplementation respectively (PL: $0.6 \pm 0.1$ vs. BR: $0.6 \pm 0.1$ $\text{m}\cdot\text{s}^{-1}$ ), (PL: $0.6 \pm 0.1$ vs. BR: $0.6 \pm 0.1$ $\text{m}\cdot\text{s}^{-1}$ ) |
|                 |                                                                                  |                                                                                                                                            |                                                                                                                                                                                                                                                                                                                                          | $\leftrightarrow V_{\text{peak}}$ during back squat after acute and chronic supplementation respectively (PL: $1.5 \pm 0.3$ vs. BR: $1.5 \pm 0.2$ $\text{m}\cdot\text{s}^{-1}$ ), (PL: $1.5 \pm 0.2$ vs. BR: $1.5 \pm 0.1$ $\text{m}\cdot\text{s}^{-1}$ )  |
|                 |                                                                                  |                                                                                                                                            |                                                                                                                                                                                                                                                                                                                                          | $\leftrightarrow V_{\text{peak}}$ during bench press after acute and chronic supplementation respectively (PL: $0.9 \pm 0.2$ vs. BR: $0.9 \pm 0.2$ $\text{m}\cdot\text{s}^{-1}$ ), (PL: $0.9 \pm 0.1$ vs. BR: $0.9 \pm 0.2$ $\text{m}\cdot\text{s}^{-1}$ ) |
|                 |                                                                                  |                                                                                                                                            |                                                                                                                                                                                                                                                                                                                                          | $\leftrightarrow$ RTF back squat after acute and chronic supplementation respectively                                                                                                                                                                      |

|                                                                                                                                                                                                                                                                                                                                                                                                                                                                                                                         |                   |                                                                                                                                           |                                                                                                                                               |                                                                                                                                                                                                                                       |
|-------------------------------------------------------------------------------------------------------------------------------------------------------------------------------------------------------------------------------------------------------------------------------------------------------------------------------------------------------------------------------------------------------------------------------------------------------------------------------------------------------------------------|-------------------|-------------------------------------------------------------------------------------------------------------------------------------------|-----------------------------------------------------------------------------------------------------------------------------------------------|---------------------------------------------------------------------------------------------------------------------------------------------------------------------------------------------------------------------------------------|
|                                                                                                                                                                                                                                                                                                                                                                                                                                                                                                                         |                   |                                                                                                                                           |                                                                                                                                               | (PL: 28 ± 9 vs. BR: 28 ± 7 reps),<br>(PL: 29 ± 10 vs. BR: 30 ± 7 reps)<br><br>↑ RTF during bench press after acute and chronic supplementation respectively +5% (PL: 23 ± 4 vs. BR: 24 ± 5 reps),<br>(PL: 24 ± 4 vs. BR: 24 ± 5 reps) |
| Williams et al.<br>[36]                                                                                                                                                                                                                                                                                                                                                                                                                                                                                                 | Eleven men        |                                                                                                                                           |                                                                                                                                               | ↑ P <sub>mean</sub> : +19.5% (PL: 508 ± 118 vs. BR: 607 ± 112 W)                                                                                                                                                                      |
|                                                                                                                                                                                                                                                                                                                                                                                                                                                                                                                         | Age: 22.1 ± 2.4 y | 2-h prior to exercise ingestion of 1 × 70 mL NO <sub>3</sub> <sup>-</sup> rich BR (~6.4 mmol or ~400 mg of NO <sub>3</sub> <sup>-</sup> ) | Free-weight bench press: 2 sets x 2 explosive reps, 5 min recovery, then 3 sets x RTF at 70%1RM interspersed with 2 min recovery between sets | ↑ V <sub>mean</sub> : +6.5% (PL: 0.6 ± 0.1 vs. BR: 0.7 ± 0.1 m·s <sup>-1</sup> )                                                                                                                                                      |
|                                                                                                                                                                                                                                                                                                                                                                                                                                                                                                                         | Ht: 1.71 ± 0.32 m |                                                                                                                                           |                                                                                                                                               | ↑ RTF: +10.7% (PL: 28 ± 6 vs. BR: 31 ± 6 reps)                                                                                                                                                                                        |
|                                                                                                                                                                                                                                                                                                                                                                                                                                                                                                                         | Wt: 89 ± 10 kg    |                                                                                                                                           |                                                                                                                                               |                                                                                                                                                                                                                                       |
| ↑ = significant increase; ↓ = significant decrease; ↔ = no change; 1RM = one-repetition maximum; BR = beetroot juice; d = day; h = hours; Ht = height, kg = kilograms; m = meters; m·s <sup>-1</sup> = meters per second; min = minutes; NO <sub>3</sub> <sup>-</sup> = nitrate; P <sub>mean</sub> = mean power; P <sub>peak</sub> = peak power; reps = repetitions; RTF = repetitions-to-failure; s = seconds; V <sub>mean</sub> = mean velocity; V <sub>peak</sub> = peak velocity; W = Watts; y = years; Wt: weight. |                   |                                                                                                                                           |                                                                                                                                               |                                                                                                                                                                                                                                       |

**Table S3.** Results from the quality assessment of studies based on the PEDro scale [30]. Total score for each study resulted from adding scores obtained for items 2-11.

| Reference                       | Item 1 | Item 2 | Item 3 | Item 4 | Item 5 | Item 6 | Item 7 | Item 8 | Item 9 | Item 10 | Item 11 | Total |
|---------------------------------|--------|--------|--------|--------|--------|--------|--------|--------|--------|---------|---------|-------|
| Garnacho-Castaño et al. [31]    | Y      | Y      | Y      | Y      | Y      | Y      | Y      | Y      | Y      | Y       | Y       | 10    |
| Mosher et al. [32]              | Y      | Y      | Y      | Y      | Y      | Y      | Y      | Y      | Y      | Y       | Y       | 10    |
| Ranchal-Sanchez et al. [37]     | Y      | Y      | Y      | Y      | Y      | Y      | Y      | N      | Y      | Y       | Y       | 9     |
| Rodríguez-Fernandez et al. [38] | Y      | Y      | Y      | Y      | Y      | Y      | Y      | N      | Y      | Y       | Y       | 9     |
| Tan et al. [35]                 | Y      | Y      | Y      | Y      | Y      | Y      | Y      | Y      | Y      | Y       | Y       | 10    |
| Williams et al. [36]            | Y      | Y      | Y      | Y      | Y      | Y      | Y      | Y      | Y      | Y       | Y       | 10    |

Y = yes; N = no

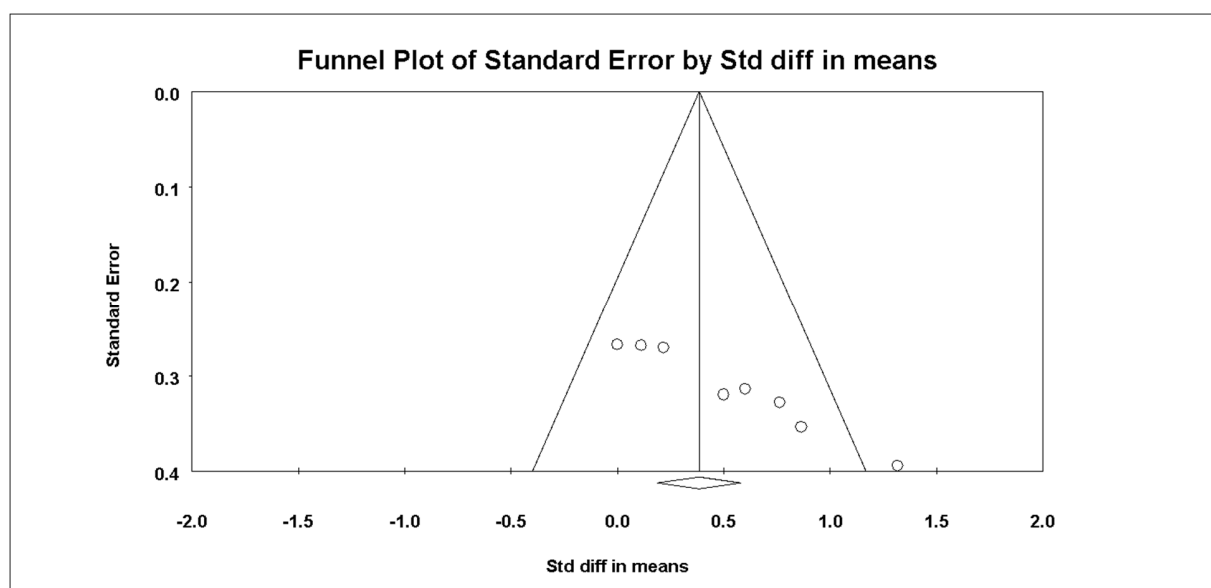

**Figure S1.** Funnel plot evaluating publication bias of trials assessing repetitions-to-failure (RTF) in groups following placebo and nitrate (n=5, but 4 additional points are due to multiple outcomes from the same study if the study measured multiple primary performance outcomes).

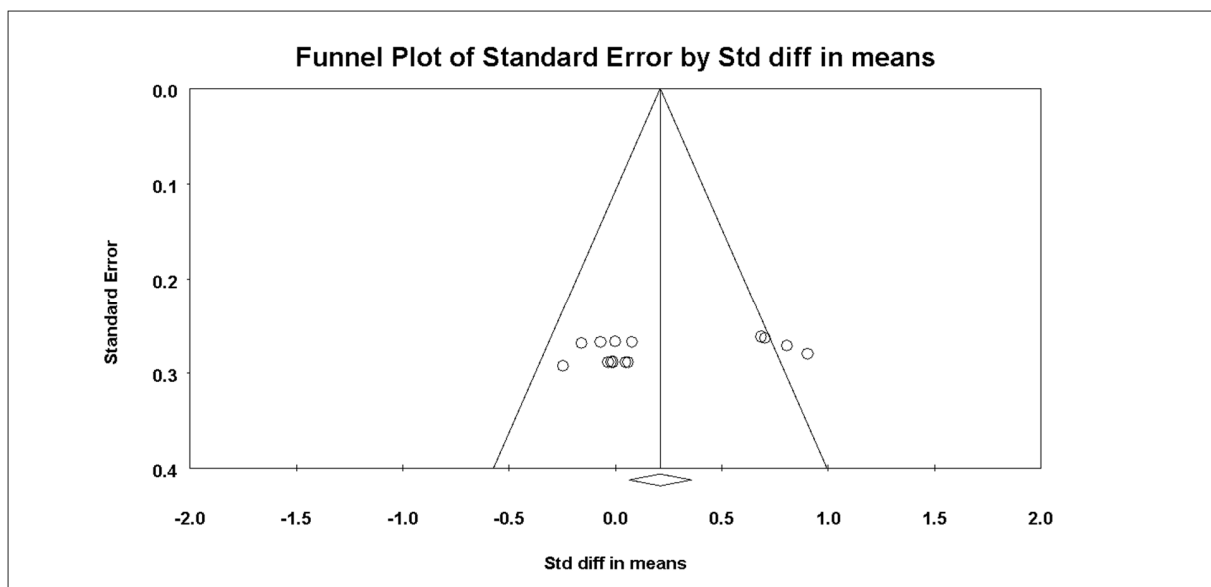

**Figure S2.** Funnel plot evaluating publication bias of trials assessing peak power output ( $P_{\text{peak}}$ ) in groups following placebo and nitrate ( $n=3$ , but 11 additional points are due to multiple outcomes from the same study if the study measured multiple primary performance outcomes).



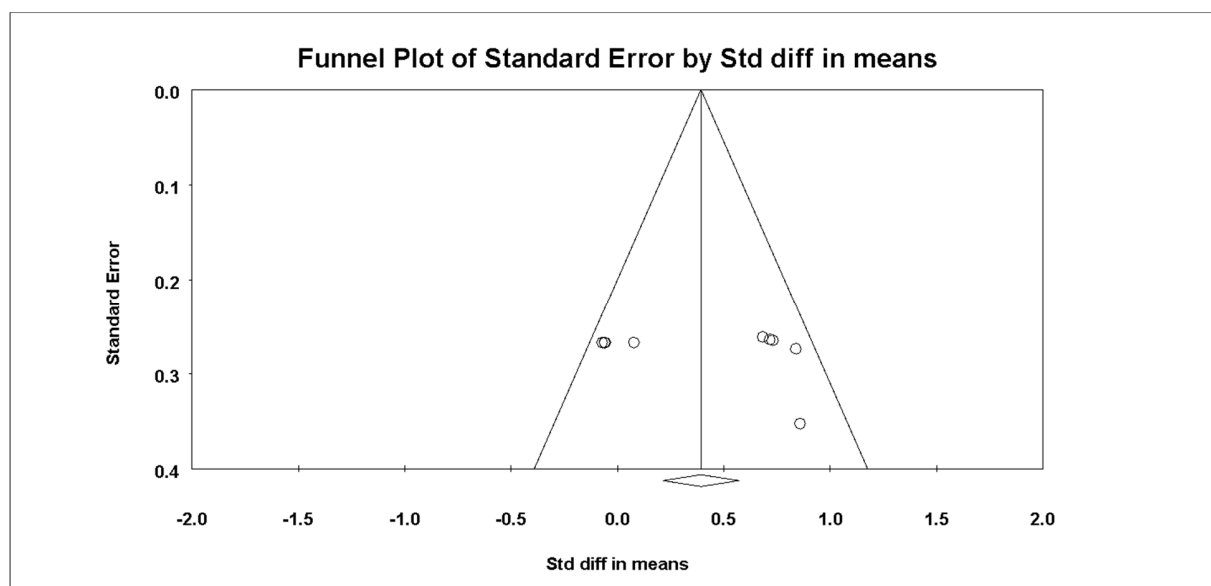

**Figure S3.** Funnel plot evaluating publication bias of trials assessing mean power output ( $P_{\text{mean}}$ ) in groups following placebo and nitrate ( $n=3$ , but 6 additional points are due to multiple outcomes from the same study if the study measured multiple primary performance outcomes).

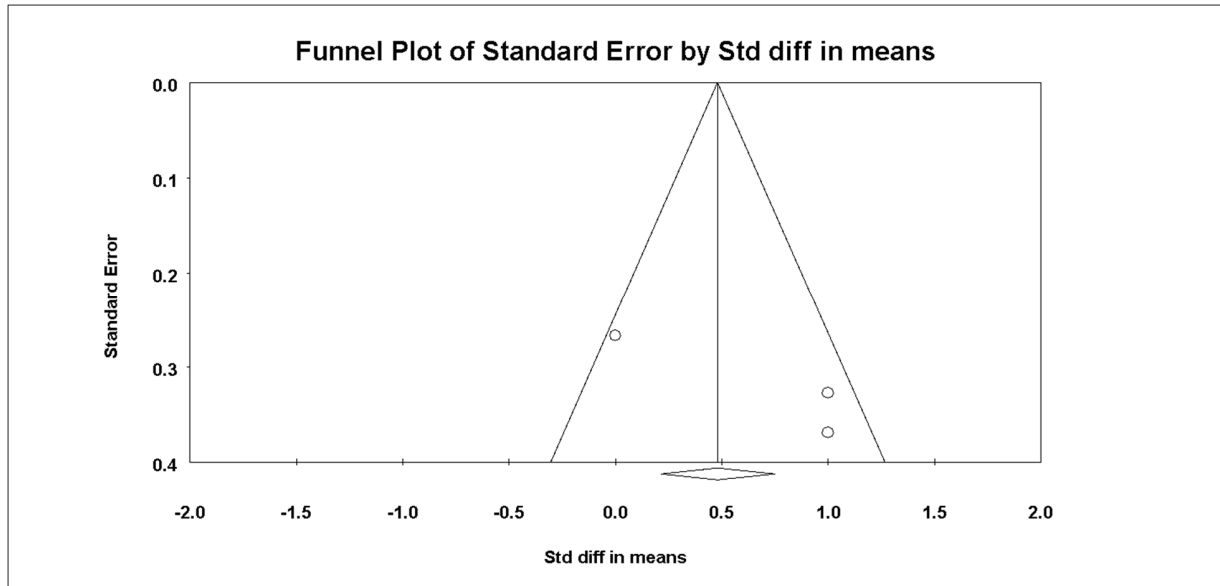

**Figure S4.** Funnel plot evaluating publication bias of trials assessing mean velocity ( $V_{\text{mean}}$ ) in groups following placebo and nitrate ( $n=2$ , but 3 additional points are due to multiple outcomes from the same study if the study measured multiple primary performance outcomes). A funnel plot for peak velocity could not be computed owing to the low number of studies and available performance outcomes.

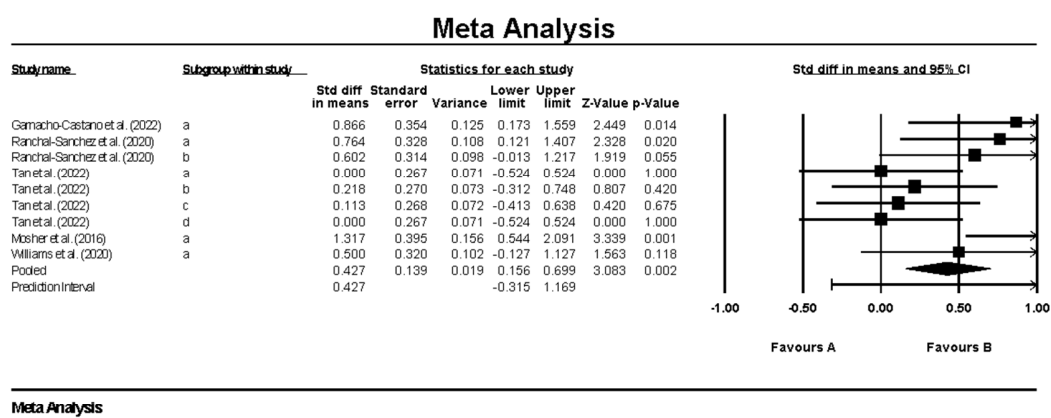

**Figure S5.** Forest plot demonstrating repetitions-to-failure (RTF) in groups following placebo (A) and nitrate (B).

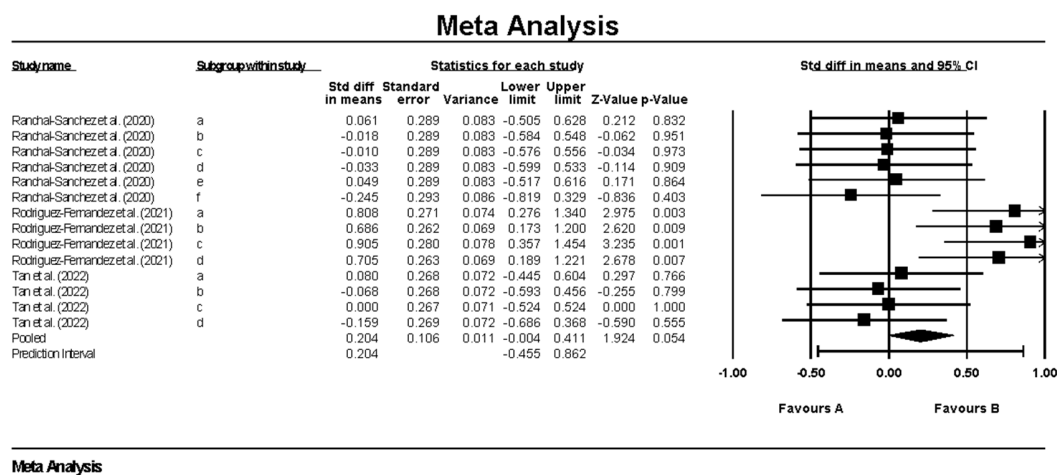

**Figure S6.** Forest plot demonstrating peak power output ( $P_{peak}$ ) in groups receiving placebo (A) and nitrate (B).

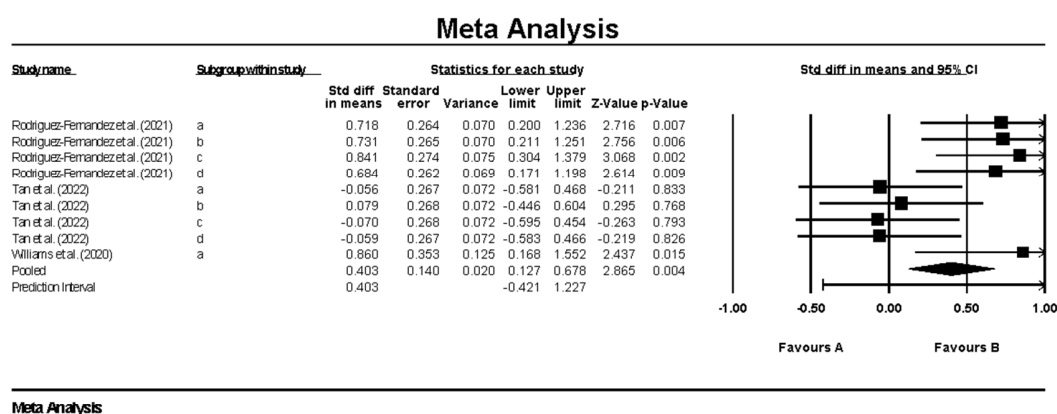

**Figure S7.** Forest plot demonstrating mean power output ( $P_{\text{mean}}$ ) in groups following placebo (A) and nitrate (B).

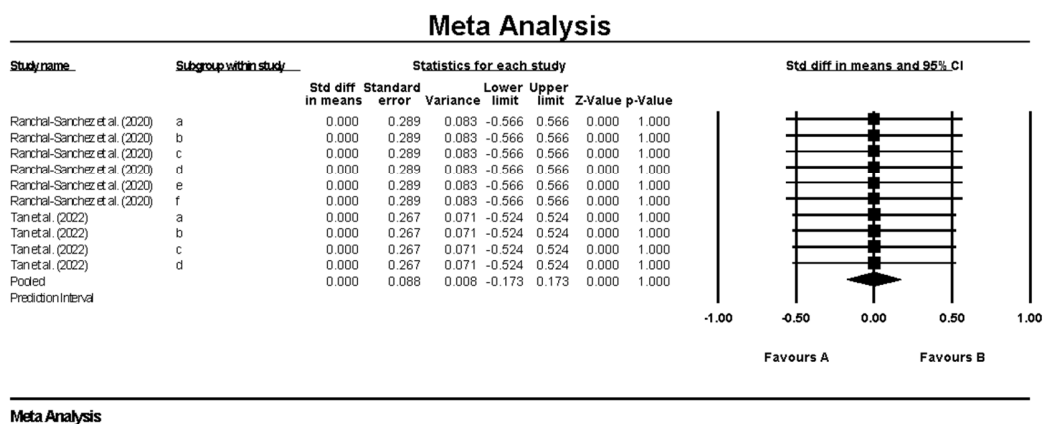

**Figure S8.** Forest plot demonstrating peak velocity ( $V_{\text{peak}}$ ) in groups following placebo (A) and nitrate (B).

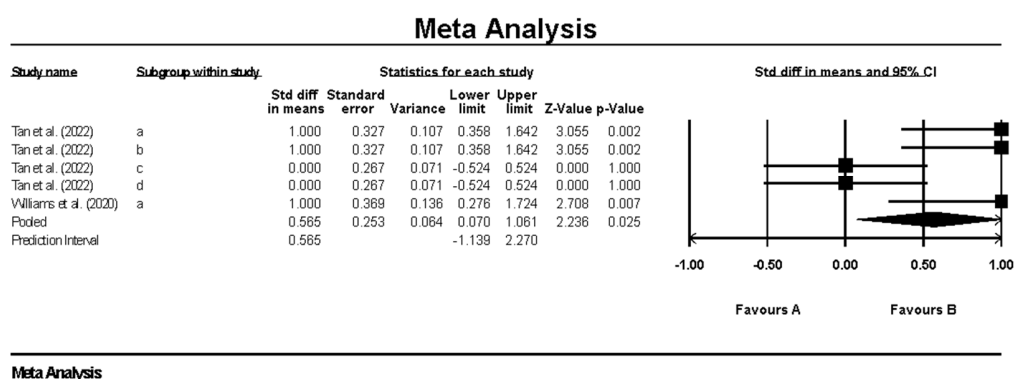

**Figure S9.** Forest plot demonstrating mean velocity ( $V_{\text{mean}}$ ) in groups following placebo (A) and nitrate (B).

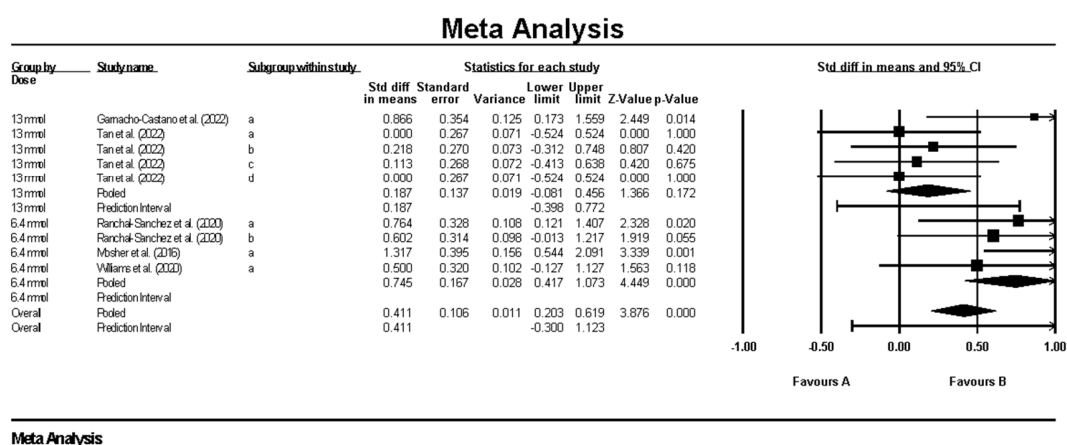

**Figure S10.** Forest plot demonstrating subgroup analysis by dose for repetitions-to-failure (RTF) following placebo (A) and nitrate (B).



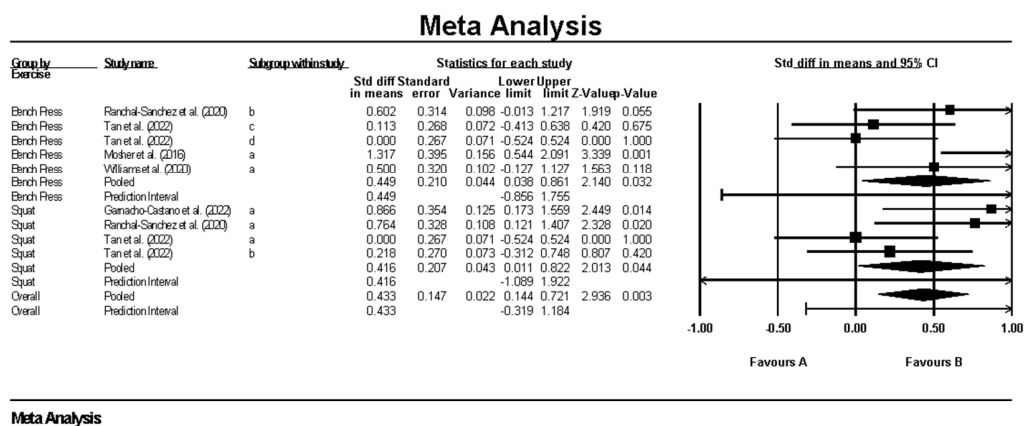

**Figure S11.** Forest plot demonstrating subgroup analysis by exercise modality for repetitions-to-failure (RTF) following placebo (A) and nitrate (B).

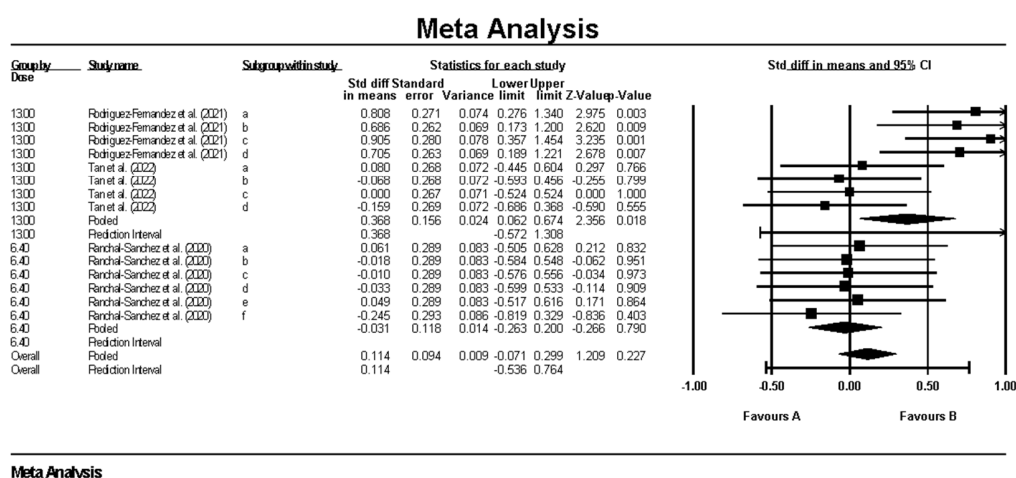

**Figure S12.** Forest plot demonstrating subgroup analysis by dose for peak power output ( $P_{peak}$ ) following placebo (A) and nitrate (B).

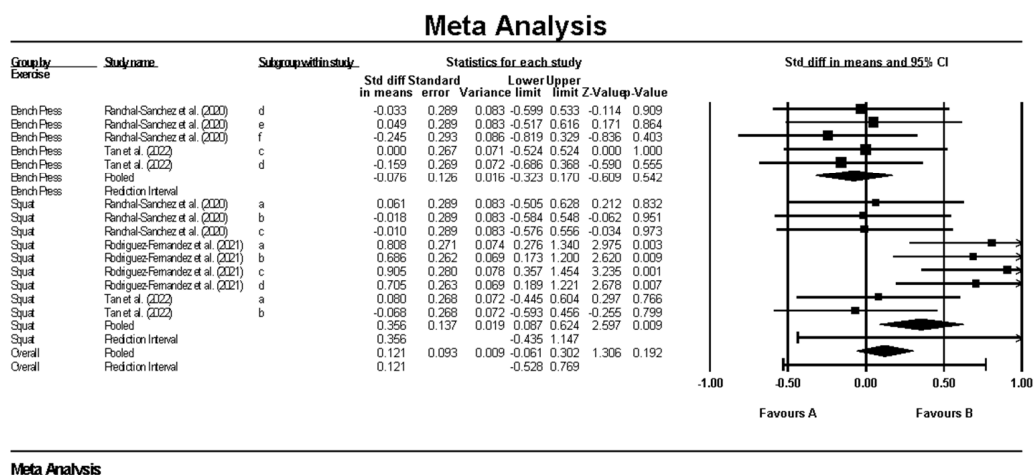

**Figure S13.** Forest plot demonstrating subgroup analysis by exercise modality for peak power output ( $P_{peak}$ ) in groups receiving placebo (A) and nitrate (B).

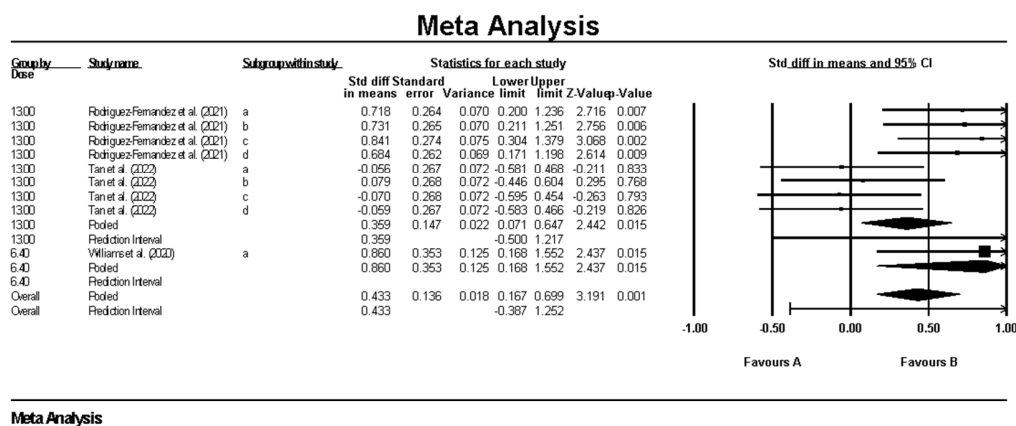

**Figure S14.** Forest plot demonstrating subgroup analysis by dose for mean power output ( $P_{\text{mean}}$ ) following placebo (A) and nitrate (B).

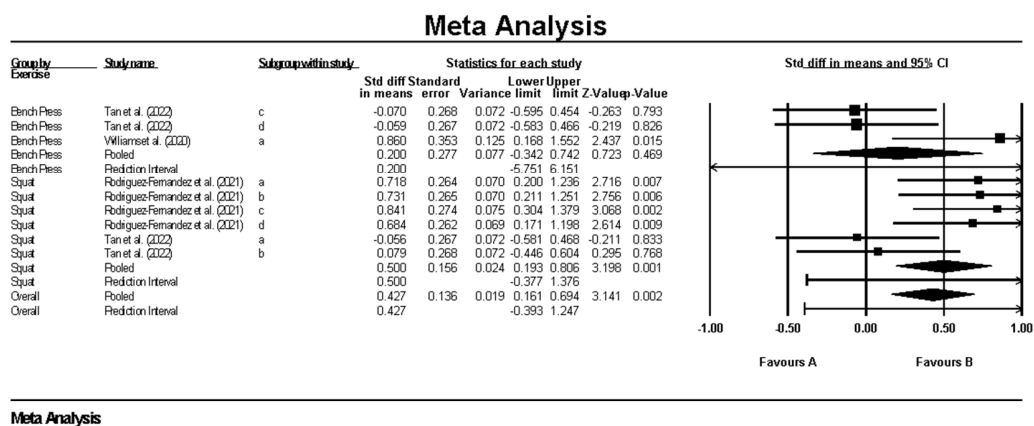

**Figure S15.** Forest plot demonstrating subgroup analysis by exercise modality for mean power output ( $P_{\text{mean}}$ ) following placebo (A) and nitrate (B).

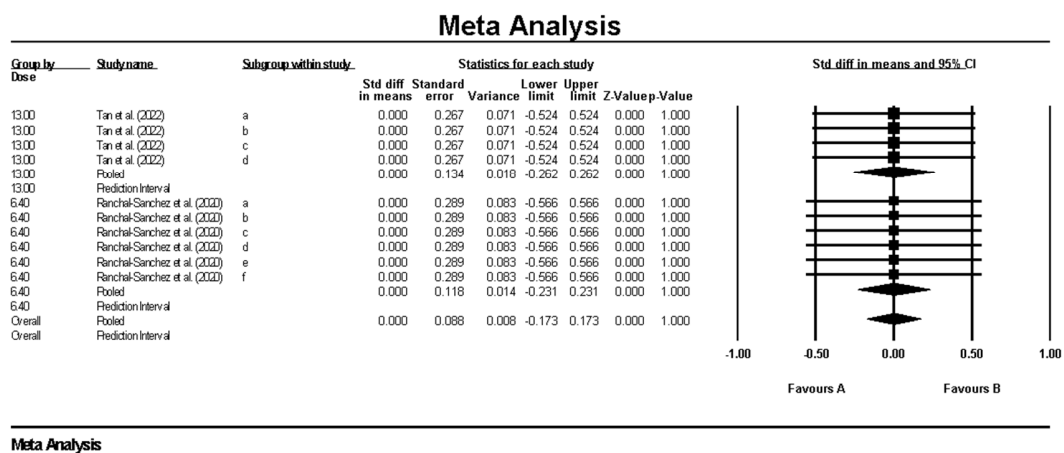

**Figure S16.** Forest plot demonstrating subgroup analysis by dose for peak velocity ( $V_{\text{peak}}$ ) following placebo (A) and nitrate (B).

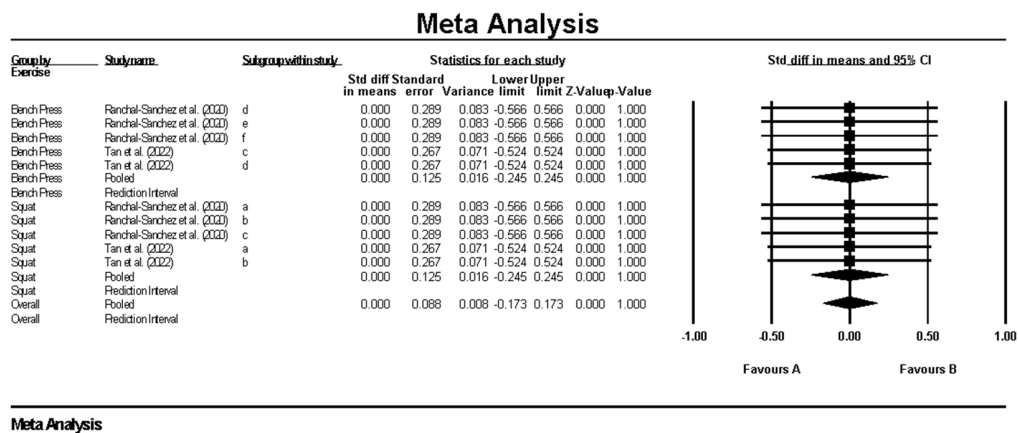

**Figure S17.** Forest plot demonstrating subgroup analysis by exercise modality for peak velocity ( $V_{peak}$ ) following placebo (A) and nitrate (B).

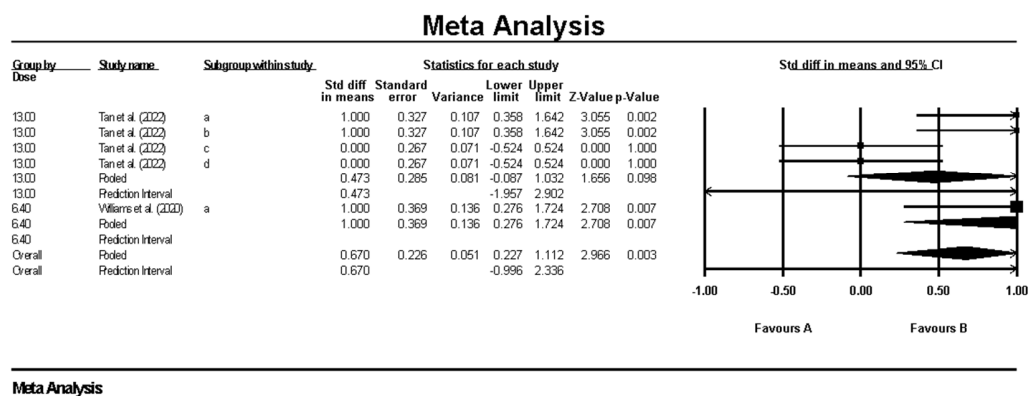

**Figure S18.** Forest plot demonstrating subgroup analysis by dose for mean velocity ( $V_{\text{mean}}$ ) following placebo (A) and nitrate (B).



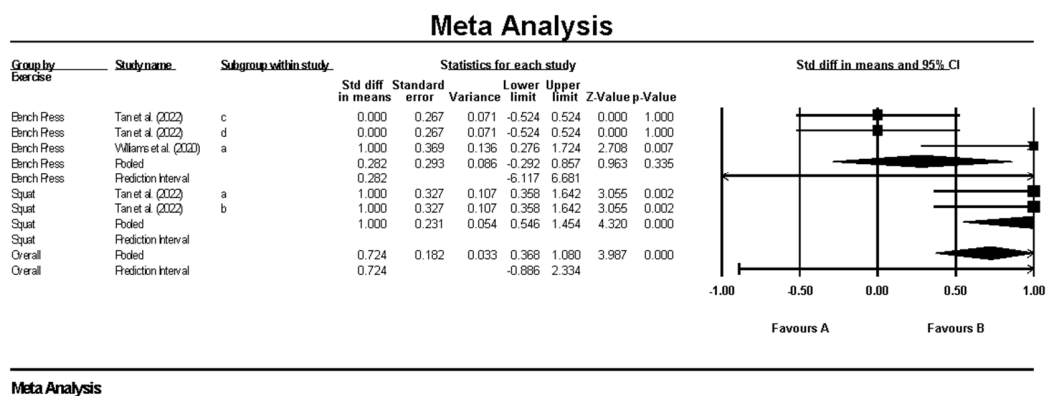

**Figure S19.** Forest plot demonstrating subgroup analysis by exercise modality for mean velocity ( $V_{\text{mean}}$ ) following placebo (A) and nitrate (B).
